# Supplementary material
Source: Springer Nature journal article supplement (https://www.springermedizin.de/resource/supplementary/13048_2012_115_MOESM3_ESM.pdf/9664930)

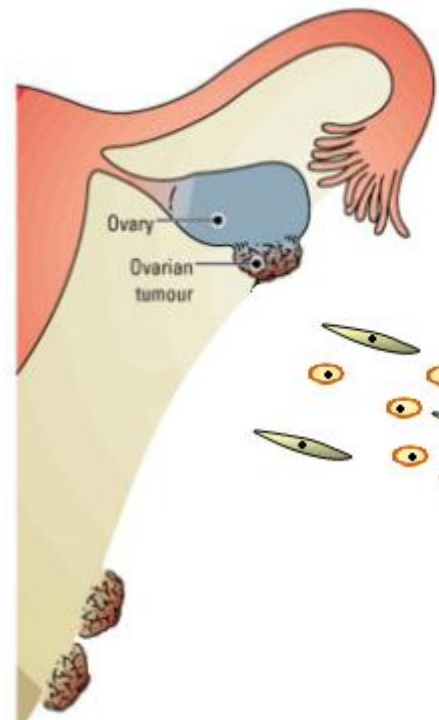

### 1. Metastasis of ovarian tumor cells

Metastasised single epithelial and fibroblastic-like ovarian tumor cells detach from primary ovarian tumor and shed the into peritoneal cavity

### 2. Chemotherapy Treatment

with platinum and taxol-based drugs

3. Evasion of chemotherapy by CSC-like cells enriched in Oct4A

### 4. Spheroid Formation

Oct4A expressing CSC-like cells can undergo self renewal or differentiation to form bulk of the spheroid

### 5. Disease recurrence

Spheroids capable of implanting at secondary site facilitate recurrence and treatment failure

Bulk of tumor mass containing differentiated EOC cells lacking Oct4A and other CSC-like markers

Oct4 A expressing CSCs – “core of the tumor spheroid”

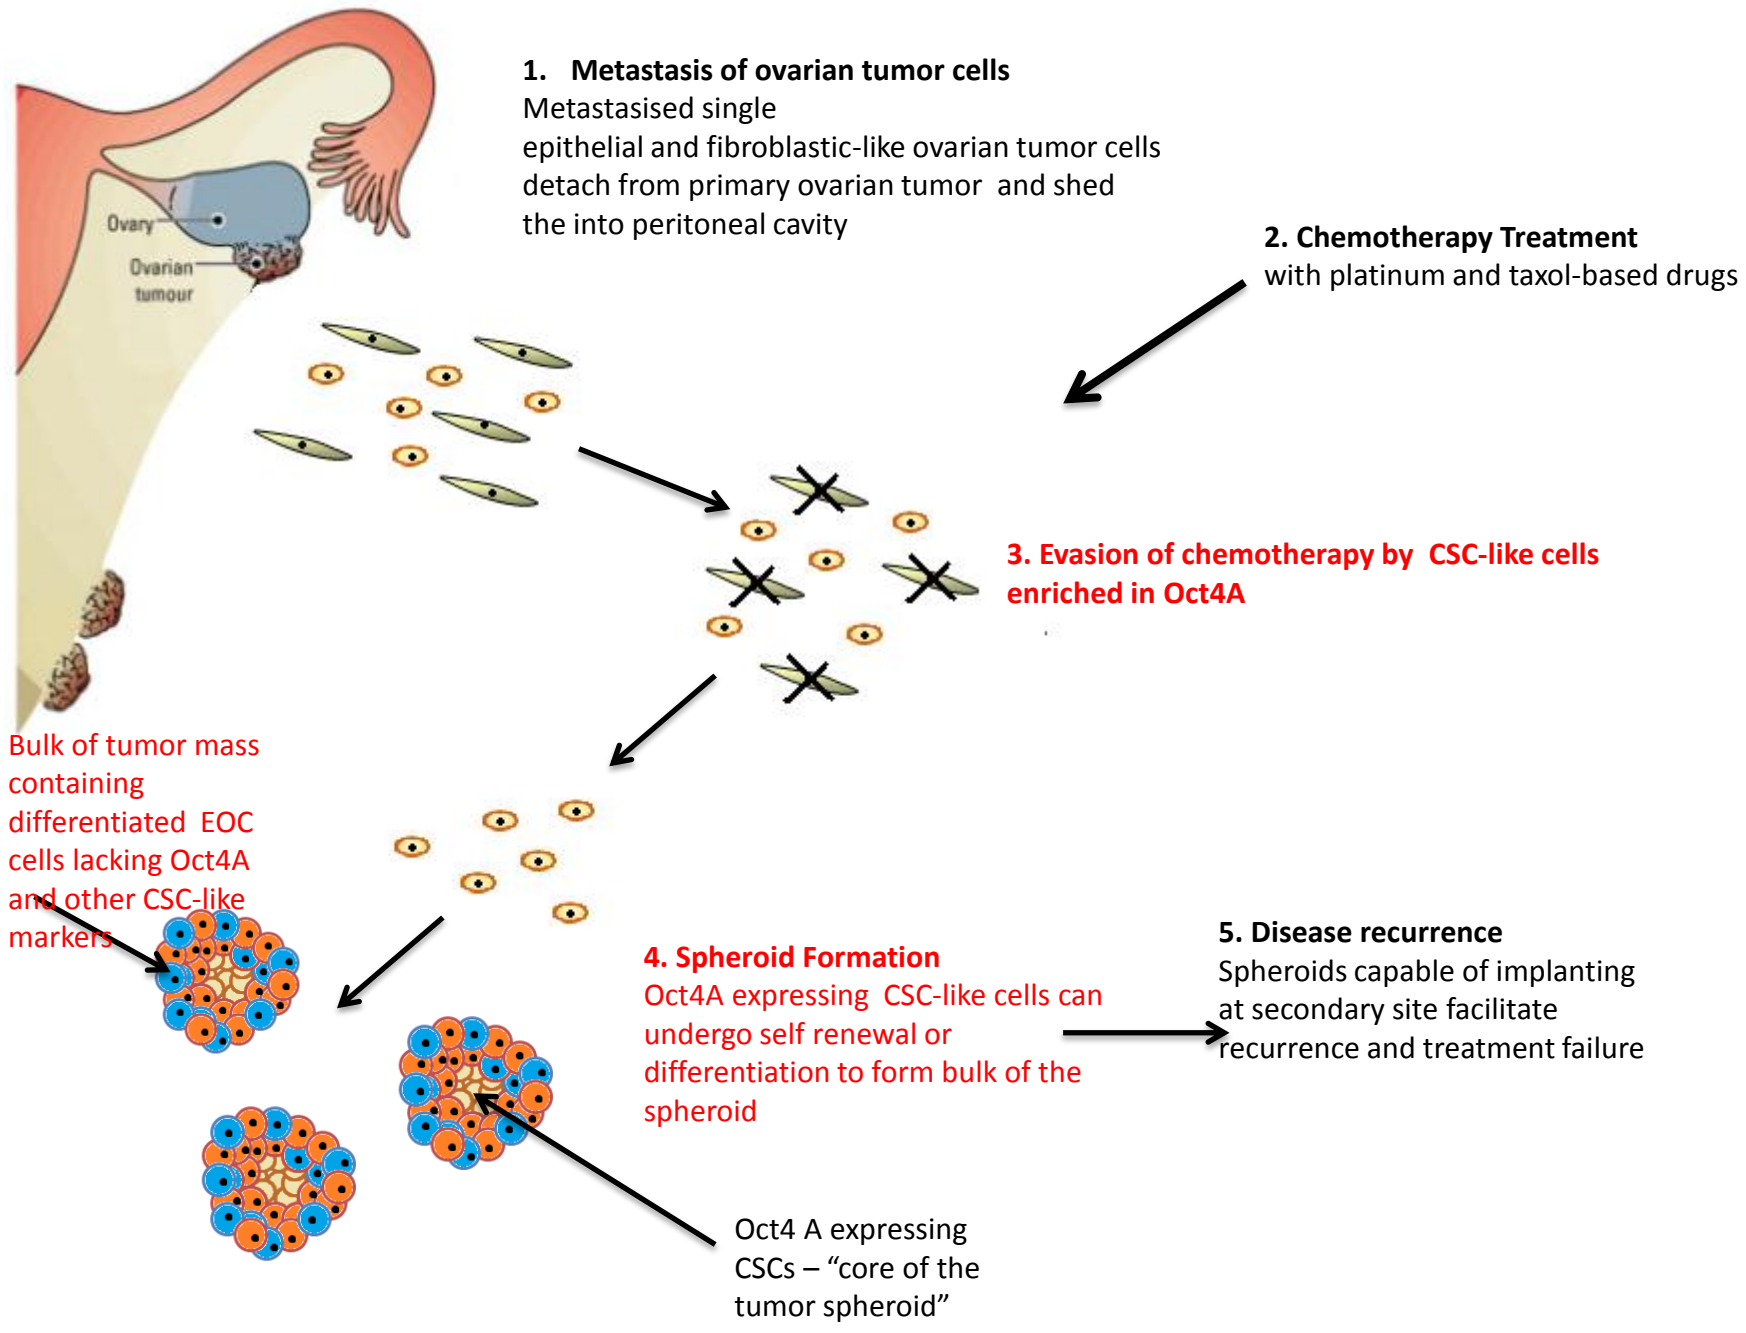

Supplement: MOESM3 [file 9664930]
